# Supplementary material
Source: PubMed Central journal article supplement (PMC6261525)
Supplement: NIHMS973387-supplement-supplement_1.pdf [file NIHMS973387-supplement-supplement_1.pdf]

1 **Supplementary Material**

2 **Video S1:** <https://goo.gl/photos/aWvDYRxQpzTS8nh78>

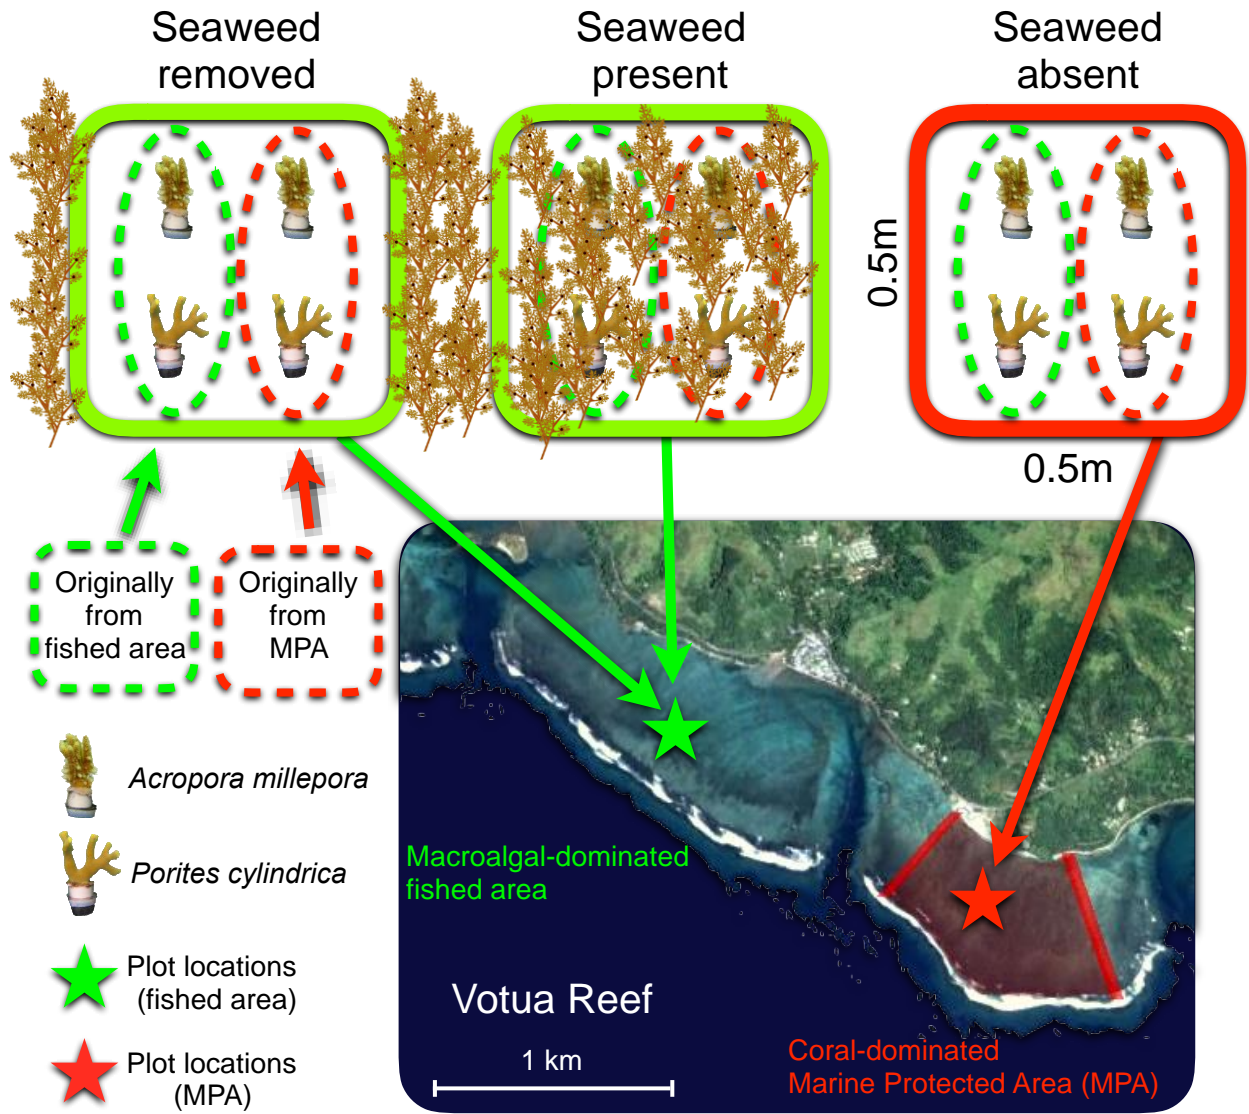

3

4 **Fig. S1:** Experimental design used for reciprocal transplant of corals to benthic plots in  
 5 macroalgal- and coral-dominated areas with or without natural macroalgal assemblages.

6

7

8

9

10

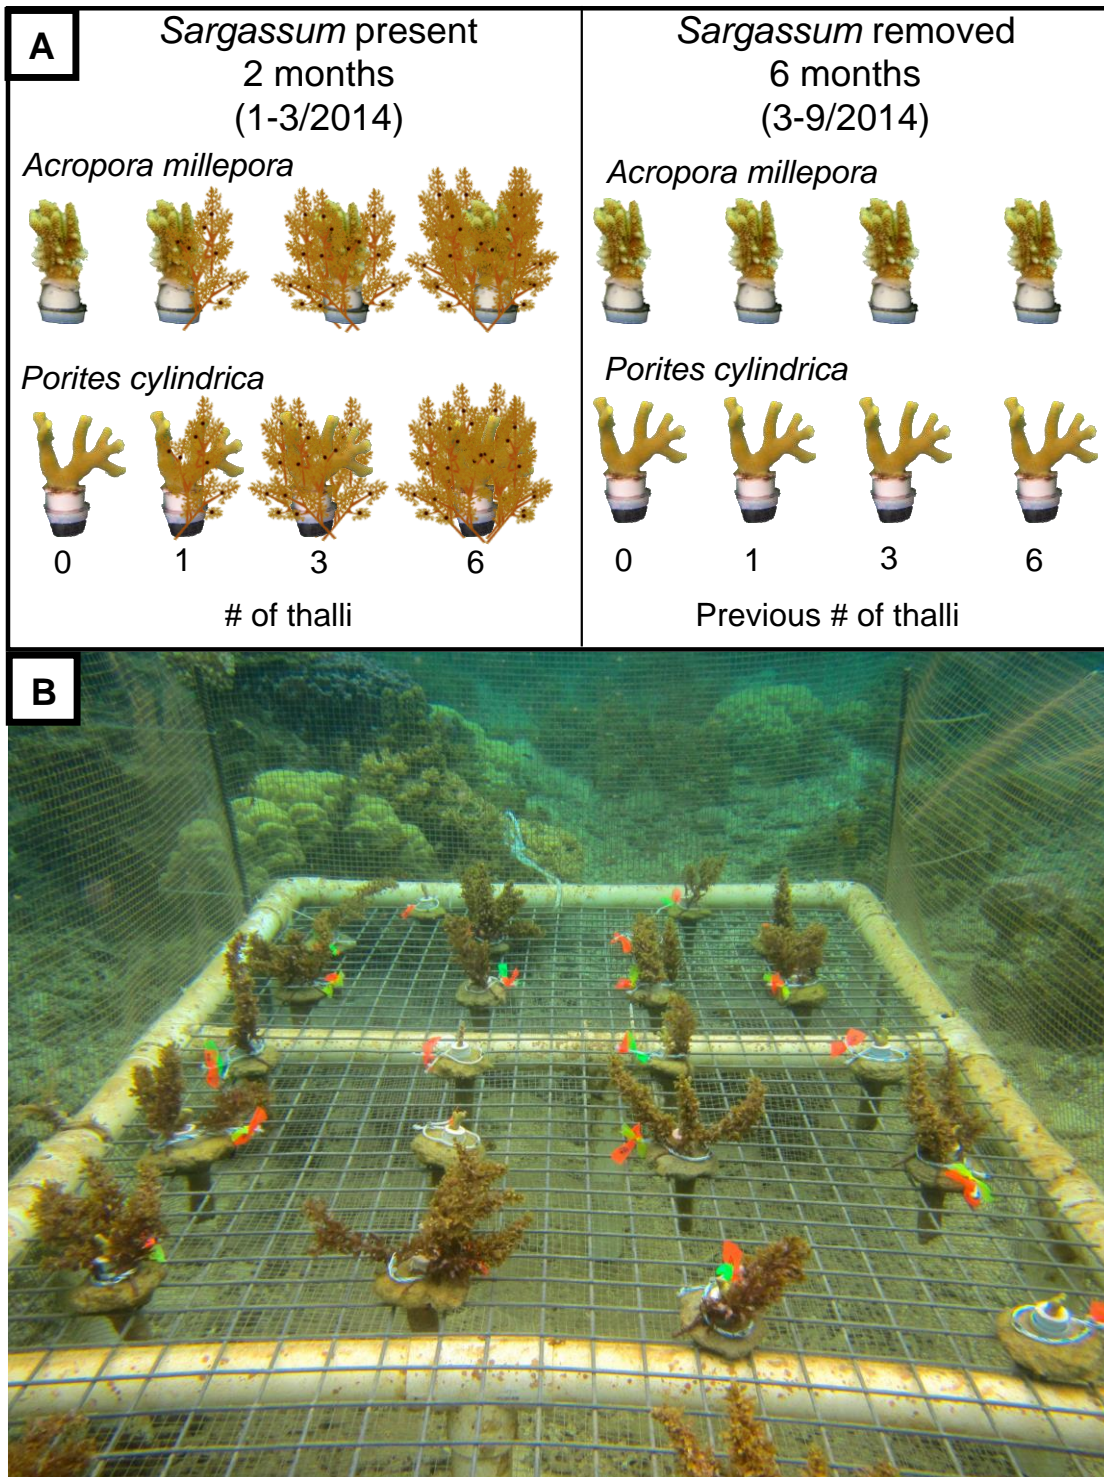

14 conducted on elevated metal racks.

### Experiment 1

Influence of proximity to natural macroalgal assemblages on coral growth and survival

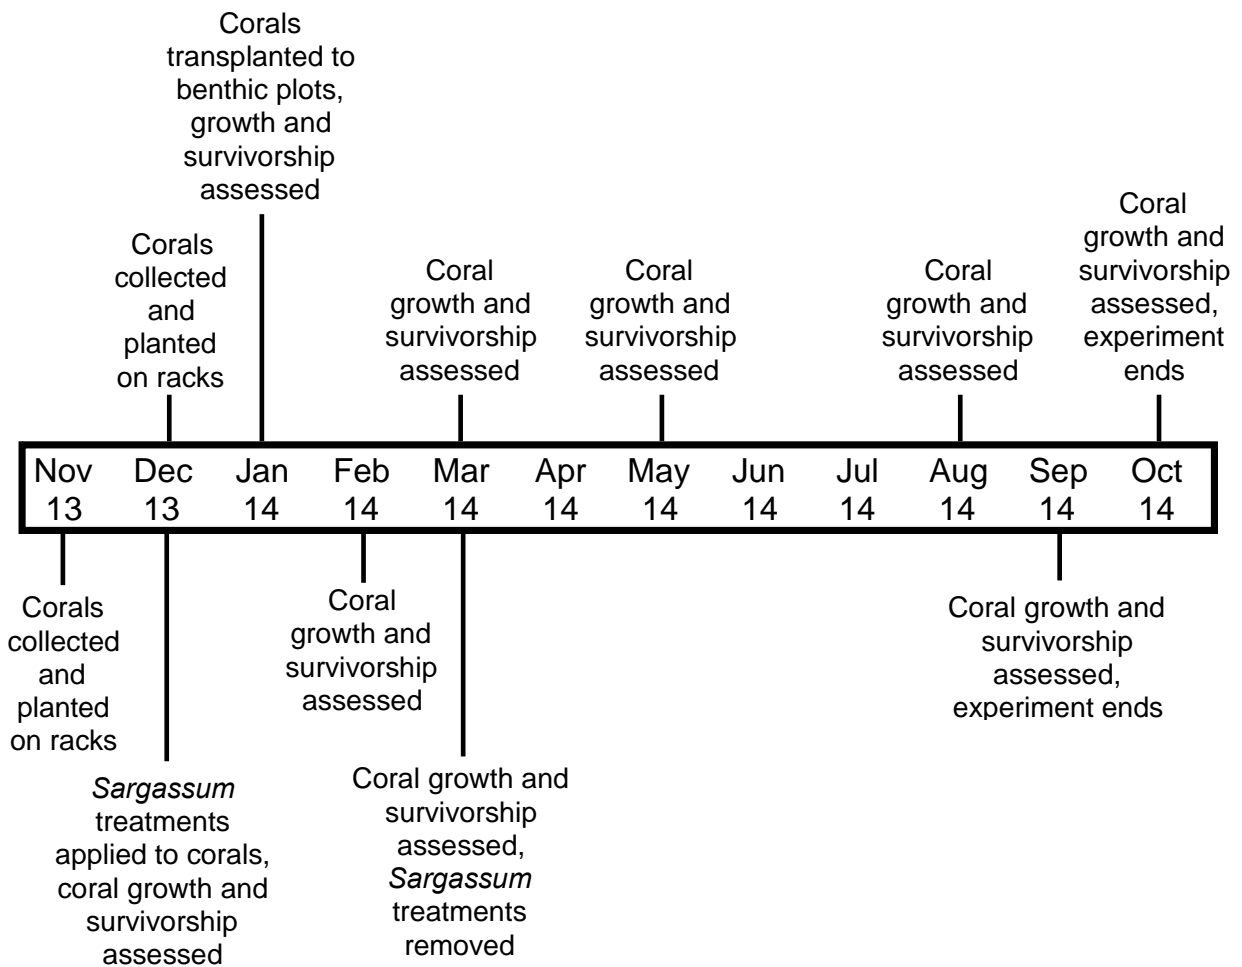

### Experiment 2

Influence of *Sargassum* density on coral growth

15

16 **Fig. S3:** A timeline of events for the experiments conducted in benthic plots (Experiment 1, top  
17 panel) and on elevated racks (Experiment 2, bottom panel) in macroalgal- and coral-dominated  
18 areas.

19

20

21

22

### 23 **Supplementary analyses assessing benthic macroalgal cover and canopy height**

24         We assessed benthic macroalgal cover and canopy height in plots within the macroalgal-  
25 dominated area where macroalgae were not removed. A 25 x 25 cm quadrat divided into 25  
26 equal (i.e., 5 x 5 cm) subsections was centered over each coral's attachment site, and percent  
27 cover of the dominant organisms/substrate types (e.g., macroalgae [to genus], live coral, dead  
28 coral, rubble, sand, etc.) within each 5 x 5 cm grid was estimated visually. Temporal differences  
29 in macroalgal cover within our plots were analyzed using a linear mixed effects (LME) model in  
30 R (v. 3.3.2) (R Core Team 2016) using the package nlme (Pinheiro et al. 2017). Models were  
31 fitted using restricted maximum likelihood with time (week) as a fixed factor and individual  
32 replicate quadrats from each plot as a random factor to account for spatial and temporal non-  
33 independence between samples. To control for heteroscedasticity, we modeled within-group  
34 error for each time point using the varIdent argument. Multiple comparisons of means were  
35 performed using generalized linear hypothesis test (glht) and Tukey's (HSD) test in the  
36 multcomp package (Hothorn et al. 2008). We also estimated the maximum and average height of  
37 the macroalgal canopy above the benthos within each quadrat by measuring the height of the  
38 tallest macroalga and the height of the canopy at five random points, respectively, within each  
39 quadrat using a ruler. Both maximum and average height data were then used to obtain a  
40 maximum and mean overall canopy height for macroalgae in each plot ( $n = 20$  plots treatment<sup>-1</sup>).  
41 Temporal differences in maximum and average canopy heights were analyzed separately with a  
42 one-way repeated measures ANOVA followed by Tukey post hoc tests using JMP (v. 13.0.0).

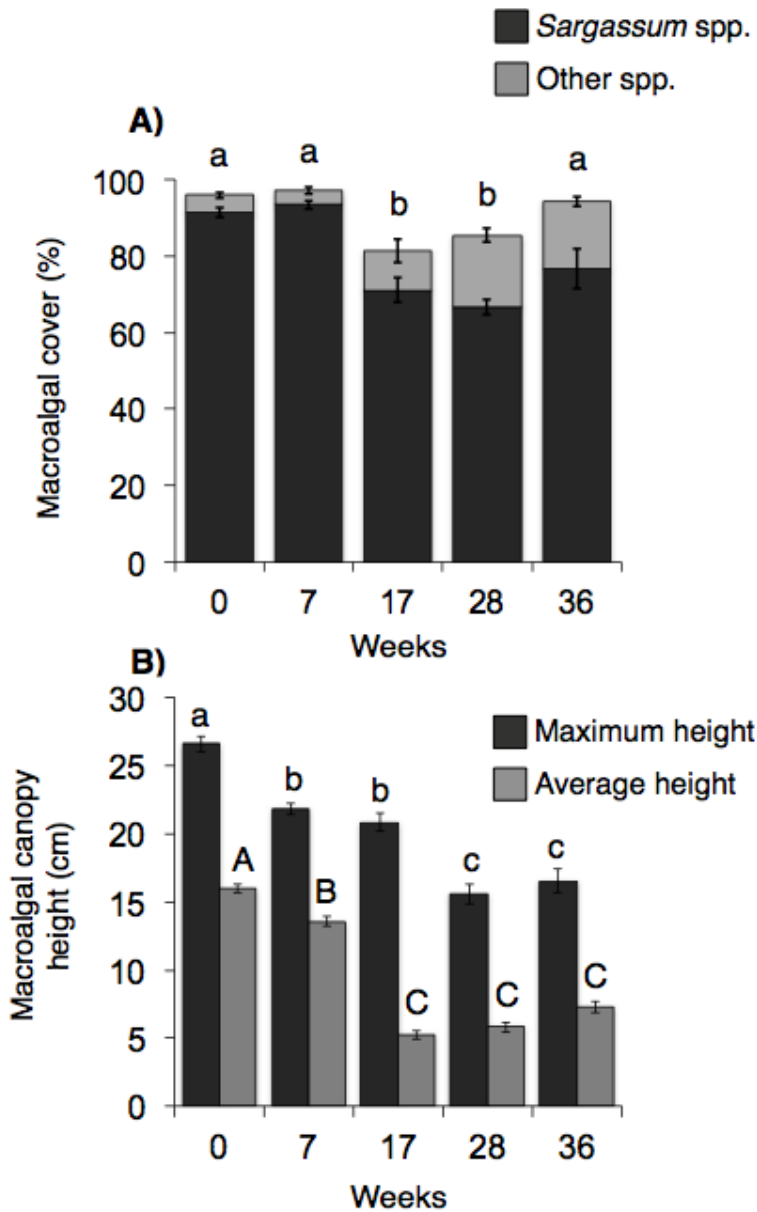

43

44 **Fig. S4:** A) Algal percent cover, January-October 2014, within plots in the macroalgal-  
 45 dominated area where natural macroalgal assemblages were present. Temporal differences in  
 46 percent macroalgal cover were analyzed using a linear mixed effect model ( $p < 0.001$ ) and letters  
 47 denote significant differences ( $p < 0.05$ ) among times via Tukey tests. B) Maximum (black bars)  
 48 and average (gray) macroalgal canopy height in plots with macroalgae during January-October  
 49 2014. One way repeated measures ANOVA were used to analyze temporal differences in

50 maximum canopy height ( $F(4,73) = 30.76, p < 0.001$ ) and average canopy height ( $F(4,72) =$   
51  $93.04, p < 0.001$ ). Letters denote significant differences ( $p < 0.05$ ) among months via Tukey  
52 tests.

53

#### 54 **LITERATURE CITED**

55 Hothorn T, Bretz F, Westfall P (2008) Simultaneous inference in general parametric models.  
56 *Biom J* 50:346-363

57 Pinheiro J, Bates D, DebRoy S, Sarkar D and R Core Team (2016) *\_nlme: Linear and*  
58 *Nonlinear Mixed Effects Models\_*. R package version 3.1-128, <URL:  
59 <http://CRAN.R-project.org/package=nlme>>

60
